# Supplementary material for: Risks associated with colonoscopy in a population-based colon screening program: an observational cohort study
Source: PubMed Central journal article supplement — CMAJ Open. 2021 Oct 12;9(4):E940–7. doi: 10.9778/cmajo.20200192 (PMC8513602; doi:10.9778/cmajo.20200192), 2021-10-12
Supplement: 2020-0192-1-at.pdf [file 2020-0192-1-at.pdf]

# COLONOSCOPY REPORTING FORM

DO NOT PLACE LABEL ABOVE LINE

AFFIX CLIENT LABEL HERE

PRESS FIRMLY TO ENSURE LEGIBILITY FOR MULTIPLE COPIES  
FAX TOP COPY TO COLON SCREENING PROGRAM: 1 (604) 297 9340  
GREY SECTIONS TO BE COMPLETED AS REQUIRED

|                      |                         |                              |                          |
|----------------------|-------------------------|------------------------------|--------------------------|
| EXAM DATE (YYYYMMDD) | START TIME (HRS)        | PHN                          | DATE OF BIRTH (YYYYMMDD) |
| FACILITY NAME        | AMENDED DATE (YYYYMMDD) | PATIENT NAME LAST            | PATIENT NAME FIRST       |
| SEX (M/F/X)          | COLONOSCOPIST (MSC)     | COLONOSCOPIST LAST, FIRST    | PRIMARY PROVIDER (MSC)   |
|                      |                         | PRIMARY PROVIDER LAST, FIRST |                          |

|                                                                                                                                                                                       |                                                                                                                                                              |
|---------------------------------------------------------------------------------------------------------------------------------------------------------------------------------------|--------------------------------------------------------------------------------------------------------------------------------------------------------------|
| Reason for Colonoscopy (select one):<br><input type="checkbox"/> FIT <input type="checkbox"/> Family History <input type="checkbox"/> Surveillance <input type="checkbox"/> Deviation | Reason Colonoscopy did not occur (select one):<br><input type="checkbox"/> No Show for Colonoscopy <input type="checkbox"/> Medically unfit day of procedure |
|---------------------------------------------------------------------------------------------------------------------------------------------------------------------------------------|--------------------------------------------------------------------------------------------------------------------------------------------------------------|

|                                                                                                                                                                                                                                                                                                                                                                                             |                                                                                                                                                                                                                                                                                                   |
|---------------------------------------------------------------------------------------------------------------------------------------------------------------------------------------------------------------------------------------------------------------------------------------------------------------------------------------------------------------------------------------------|---------------------------------------------------------------------------------------------------------------------------------------------------------------------------------------------------------------------------------------------------------------------------------------------------|
| <b>1. BOWEL PREPARATION</b><br><input type="checkbox"/> Excellent <input type="checkbox"/> Good<br><input type="checkbox"/> Fair (adequate to visualize all polyps > 5mm)<br><input type="checkbox"/> Poor (inadequate to visualize all polyps > 5mm)                                                                                                                                       | <b>2. CECAL INTUBATION (or ileocolonic anastomosis reached)</b><br><input type="checkbox"/> Yes → Photo documentation? <input type="checkbox"/> No <input type="checkbox"/> Yes<br><input type="checkbox"/> No <input type="checkbox"/> Uncertain <input type="checkbox"/> Flexible Sigmoidoscopy |
| <b>3. UNPLANNED EVENTS</b> <input type="checkbox"/> None<br><input type="checkbox"/> Perforation <input type="checkbox"/> Admit to hospital<br><input type="checkbox"/> Bleeding <input type="checkbox"/> Reversal agents<br><input type="checkbox"/> Cardiovascular <input type="checkbox"/> Death<br><input type="checkbox"/> Respiratory <input type="checkbox"/> Other (specify): _____ | <b>4. SPECIMENS TAKEN:</b> <input type="checkbox"/> Yes <input type="checkbox"/> No → <b>WITHDRAWAL TIME:</b> _____<br><b>5. COMMENTS TO PATHOLOGIST:</b> _____<br>(Minutes)                                                                                                                      |

|                | Specimen Type | Location | Size(mm) |     |       |     | Morphology | Primary Removal Mode | Submucosal Injection (Y/N) | Piecemeal (Y/N) | Complete Removal (Y/N/U) | Complete Retrieval (Y/N/U) | Specimen Sent (Y/N/#) | Time         | Initials  |
|----------------|---------------|----------|----------|-----|-------|-----|------------|----------------------|----------------------------|-----------------|--------------------------|----------------------------|-----------------------|--------------|-----------|
|                |               |          | ≤5       | 6-9 | 10-19 | ≥20 |            |                      |                            |                 |                          |                            |                       |              |           |
| <b>Example</b> | <b>P</b>      | <b>T</b> |          | ✓   |       |     | <b>P</b>   | <b>HS</b>            | <b>Y</b>                   | <b>Y</b>        | <b>Y</b>                 | <b>Y</b>                   | <b>Y</b>              | <b>14:00</b> | <b>AB</b> |
| 1/A            |               |          |          |     |       |     |            |                      |                            |                 |                          |                            |                       |              |           |
| 2/B            |               |          |          |     |       |     |            |                      |                            |                 |                          |                            |                       |              |           |
| 3/C            |               |          |          |     |       |     |            |                      |                            |                 |                          |                            |                       |              |           |
| 4/D            |               |          |          |     |       |     |            |                      |                            |                 |                          |                            |                       |              |           |
| 5/E            |               |          |          |     |       |     |            |                      |                            |                 |                          |                            |                       |              |           |

| <b>6.</b> <input type="checkbox"/> Additional specimens recorded on Page 2<br><b>7.</b> <input type="checkbox"/> Repeat Colonoscopy Required<br><b>COMPLETE COLONOSCOPY REPORTING FORM FOR NEXT SCOPE</b> | <table border="1" style="width:100%; border-collapse: collapse; font-size: small;"> <tr> <th style="width:25%;">Specimen Type</th> <th style="width:25%;">Location</th> <th style="width:25%;">Morphology</th> <th style="width:25%;">Removal Mode</th> </tr> <tr> <td>B = biopsies<br/>P = polypectomy</td> <td>A = ascending colon<br/>C = cecum   D = descending<br/>I = ileum   L = left colon<br/>O = other/random<br/>R = rectum   S = sigmoid<br/>T = transverse colon</td> <td>F = flat<br/>M = mass<br/>O = other<br/>P = pedunculated<br/>S = sessile</td> <td>BF = biopsy forceps<br/>CS = cold snare<br/>HB = hot biopsy forceps<br/>HS = hot snare</td> </tr> <tr> <td>Y = yes   N = no<br/>U = uncertain</td> <td></td> <td></td> <td></td> </tr> </table> | Specimen Type                                                        | Location                                                                            | Morphology | Removal Mode | B = biopsies<br>P = polypectomy | A = ascending colon<br>C = cecum   D = descending<br>I = ileum   L = left colon<br>O = other/random<br>R = rectum   S = sigmoid<br>T = transverse colon | F = flat<br>M = mass<br>O = other<br>P = pedunculated<br>S = sessile | BF = biopsy forceps<br>CS = cold snare<br>HB = hot biopsy forceps<br>HS = hot snare | Y = yes   N = no<br>U = uncertain |  |  |  |
|-----------------------------------------------------------------------------------------------------------------------------------------------------------------------------------------------------------|--------------------------------------------------------------------------------------------------------------------------------------------------------------------------------------------------------------------------------------------------------------------------------------------------------------------------------------------------------------------------------------------------------------------------------------------------------------------------------------------------------------------------------------------------------------------------------------------------------------------------------------------------------------------------------------------------------------------------------------------------------------------------|----------------------------------------------------------------------|-------------------------------------------------------------------------------------|------------|--------------|---------------------------------|---------------------------------------------------------------------------------------------------------------------------------------------------------|----------------------------------------------------------------------|-------------------------------------------------------------------------------------|-----------------------------------|--|--|--|
| Specimen Type                                                                                                                                                                                             | Location                                                                                                                                                                                                                                                                                                                                                                                                                                                                                                                                                                                                                                                                                                                                                                 | Morphology                                                           | Removal Mode                                                                        |            |              |                                 |                                                                                                                                                         |                                                                      |                                                                                     |                                   |  |  |  |
| B = biopsies<br>P = polypectomy                                                                                                                                                                           | A = ascending colon<br>C = cecum   D = descending<br>I = ileum   L = left colon<br>O = other/random<br>R = rectum   S = sigmoid<br>T = transverse colon                                                                                                                                                                                                                                                                                                                                                                                                                                                                                                                                                                                                                  | F = flat<br>M = mass<br>O = other<br>P = pedunculated<br>S = sessile | BF = biopsy forceps<br>CS = cold snare<br>HB = hot biopsy forceps<br>HS = hot snare |            |              |                                 |                                                                                                                                                         |                                                                      |                                                                                     |                                   |  |  |  |
| Y = yes   N = no<br>U = uncertain                                                                                                                                                                         |                                                                                                                                                                                                                                                                                                                                                                                                                                                                                                                                                                                                                                                                                                                                                                          |                                                                      |                                                                                     |            |              |                                 |                                                                                                                                                         |                                                                      |                                                                                     |                                   |  |  |  |

|                                 |                                 |
|---------------------------------|---------------------------------|
| MD NAME: _____ SIGNATURE: _____ | RN NAME: _____ SIGNATURE: _____ |
|---------------------------------|---------------------------------|

**SEND COPIES OF PATHOLOGY REPORT TO:**

|                                                        |                                            |                                 |                                 |
|--------------------------------------------------------|--------------------------------------------|---------------------------------|---------------------------------|
| 1. BC Cancer Colon Screening<br>Fax#: 1 (604) 297 9340 | 2. _____<br>Primary Provider (Name & MSC#) | 3. _____<br>Other (Name & MSC#) | 4. _____<br>Other (Name & MSC#) |
|--------------------------------------------------------|--------------------------------------------|---------------------------------|---------------------------------|

|                                                                                                       |                                                  |                |             |  |
|-------------------------------------------------------------------------------------------------------|--------------------------------------------------|----------------|-------------|--|
| Specimen tracking required by facility?<br><input type="checkbox"/> No <input type="checkbox"/> Yes → | Number of samples sent to collection area: _____ | INITIALS _____ | DATE: _____ |  |
|                                                                                                       | Number of samples transported to lab: _____      | INITIALS _____ | DATE: _____ |  |
|                                                                                                       | Number of samples received by lab: _____         | INITIALS _____ | DATE: _____ |  |

PATHOLOGY COPY | FAX THIS COPY TO 1 (604) 297 9340

INFORMATION ON THIS FORM IS CONFIDENTIAL. IF YOU RECEIVE THIS IN ERROR PLEASE FAX TO QUALITY DEPT: 1 (604) 675 7223

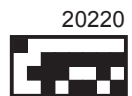

# COLONOSCOPY REPORTING FORM

DO NOT PLACE LABEL ABOVE LINE

AFFIX CLIENT LABEL HERE

PRESS FIRMLY TO ENSURE LEGIBILITY FOR MULTIPLE COPIES  
FAX TOP COPY TO COLON SCREENING PROGRAM: 1 (604) 297 9340  
GREY SECTIONS TO BE COMPLETED AS REQUIRED

|                      |                         |                              |                          |
|----------------------|-------------------------|------------------------------|--------------------------|
| EXAM DATE (YYYYMMDD) | START TIME (HRS)        | PHN                          | DATE OF BIRTH (YYYYMMDD) |
| FACILITY NAME        | AMENDED DATE (YYYYMMDD) | PATIENT NAME LAST            | PATIENT NAME FIRST       |
| SEX (M/F/X)          | COLONOSCOPIST (MSC)     | COLONOSCOPIST LAST, FIRST    | PRIMARY PROVIDER (MSC)   |
|                      |                         | PRIMARY PROVIDER LAST, FIRST |                          |

|                                                                                                                                                                                       |                                                                                                                                                              |
|---------------------------------------------------------------------------------------------------------------------------------------------------------------------------------------|--------------------------------------------------------------------------------------------------------------------------------------------------------------|
| Reason for Colonoscopy (select one):<br><input type="checkbox"/> FIT <input type="checkbox"/> Family History <input type="checkbox"/> Surveillance <input type="checkbox"/> Deviation | Reason Colonoscopy did not occur (select one):<br><input type="checkbox"/> No Show for Colonoscopy <input type="checkbox"/> Medically unfit day of procedure |
|---------------------------------------------------------------------------------------------------------------------------------------------------------------------------------------|--------------------------------------------------------------------------------------------------------------------------------------------------------------|

**1. BOWEL PREPARATION**

- Excellent    Good
- Fair (adequate to visualize all polyps > 5mm)
- Poor (inadequate to visualize all polyps > 5mm)

**3. UNPLANNED EVENTS**

- Perforation    Admit to hospital
- Bleeding    Reversal agents
- Cardiovascular    Death
- Respiratory    Other (specify): \_\_\_\_\_

**2. CECAL INTUBATION (or ileocolonic anastomosis reached)**

- Yes → **Photo documentation?**    No    Yes
- No    Uncertain    Flexible Sigmoidoscopy

**4. SPECIMENS TAKEN:**  Yes  No → **WITHDRAWAL TIME:** \_\_\_\_\_ (Minutes)

**5. COMMENTS TO PATHOLOGIST:**

|         | Specimen Type | Location | Size(mm) |     |       |     | Morphology | Primary Removal Mode | Submucosal Injection (Y/N) | Piecemeal (Y/N) | Complete Removal (Y/N/U) | Complete Retrieval (Y/N/U) | Specimen Sent (Y/N/#) | Time  | Initials |
|---------|---------------|----------|----------|-----|-------|-----|------------|----------------------|----------------------------|-----------------|--------------------------|----------------------------|-----------------------|-------|----------|
|         |               |          | ≤5       | 6-9 | 10-19 | ≥20 |            |                      |                            |                 |                          |                            |                       |       |          |
| Example | P             | T        |          | ✓   |       |     | P          | HS                   | Y                          | Y               | Y                        | Y                          | Y                     | 14:00 | AB       |
| 1/A     |               |          |          |     |       |     |            |                      |                            |                 |                          |                            |                       |       |          |
| 2/B     |               |          |          |     |       |     |            |                      |                            |                 |                          |                            |                       |       |          |
| 3/C     |               |          |          |     |       |     |            |                      |                            |                 |                          |                            |                       |       |          |
| 4/D     |               |          |          |     |       |     |            |                      |                            |                 |                          |                            |                       |       |          |
| 5/E     |               |          |          |     |       |     |            |                      |                            |                 |                          |                            |                       |       |          |

6.  Additional specimens recorded on Page 2

7.  Repeat Colonoscopy Required

**COMPLETE COLONOSCOPY REPORTING FORM FOR NEXT SCOPE**

|                                                         |                                                                                                                                                                      |                                                                                           |                                                                                                            |
|---------------------------------------------------------|----------------------------------------------------------------------------------------------------------------------------------------------------------------------|-------------------------------------------------------------------------------------------|------------------------------------------------------------------------------------------------------------|
| <b>Specimen Type</b><br>B = biopsies<br>P = polypectomy | <b>Location</b><br>A = ascending colon<br>C = cecum D = descending<br>I = ileum L = left colon<br>O = other/random<br>R = rectum S = sigmoid<br>T = transverse colon | <b>Morphology</b><br>F = flat<br>M = mass<br>O = other<br>P = pedunculated<br>S = sessile | <b>Removal Mode</b><br>BF = biopsy forceps<br>CS = cold snare<br>HB = hot biopsy forceps<br>HS = hot snare |
| Y = yes   N = no<br>U = uncertain                       |                                                                                                                                                                      |                                                                                           |                                                                                                            |

|                                 |                                 |
|---------------------------------|---------------------------------|
| MD NAME: _____ SIGNATURE: _____ | RN NAME: _____ SIGNATURE: _____ |
|---------------------------------|---------------------------------|

**SEND COPIES OF PATHOLOGY REPORT TO:**

|                                                        |                                            |                                 |                                 |
|--------------------------------------------------------|--------------------------------------------|---------------------------------|---------------------------------|
| 1. BC Cancer Colon Screening<br>Fax#: 1 (604) 297 9340 | 2. _____<br>Primary Provider (Name & MSC#) | 3. _____<br>Other (Name & MSC#) | 4. _____<br>Other (Name & MSC#) |
|--------------------------------------------------------|--------------------------------------------|---------------------------------|---------------------------------|

|                                                                                                       |                                                  |                |             |
|-------------------------------------------------------------------------------------------------------|--------------------------------------------------|----------------|-------------|
| Specimen tracking required by facility?<br><input type="checkbox"/> No <input type="checkbox"/> Yes → | Number of samples sent to collection area: _____ | INITIALS _____ | DATE: _____ |
|                                                                                                       | Number of samples transported to lab: _____      | INITIALS _____ | DATE: _____ |
|                                                                                                       | Number of samples received by lab: _____         | INITIALS _____ | DATE: _____ |

CHART COPY | FILE IN CHART

INFORMATION ON THIS FORM IS CONFIDENTIAL. IF YOU RECEIVE THIS IN ERROR PLEASE FAX TO QUALITY DEPT: 1 (604) 675 7223

20220

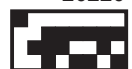

# COLONOSCOPY REPORTING FORM

DO NOT PLACE LABEL ABOVE LINE

AFFIX CLIENT LABEL HERE

PRESS FIRMLY TO ENSURE LEGIBILITY FOR MULTIPLE COPIES  
FAX TOP COPY TO COLON SCREENING PROGRAM: 1 (604) 297 9340  
GREY SECTIONS TO BE COMPLETED AS REQUIRED

|                      |                         |                              |                          |
|----------------------|-------------------------|------------------------------|--------------------------|
| EXAM DATE (YYYYMMDD) | START TIME (HRS)        | PHN                          | DATE OF BIRTH (YYYYMMDD) |
| FACILITY NAME        | AMENDED DATE (YYYYMMDD) | PATIENT NAME LAST            | PATIENT NAME FIRST       |
| SEX (M/F/X)          | COLONOSCOPIST (MSC)     | COLONOSCOPIST LAST, FIRST    | PRIMARY PROVIDER (MSC)   |
|                      |                         | PRIMARY PROVIDER LAST, FIRST |                          |

|                                                                                                                                                                                       |                                                                                                                                                              |
|---------------------------------------------------------------------------------------------------------------------------------------------------------------------------------------|--------------------------------------------------------------------------------------------------------------------------------------------------------------|
| Reason for Colonoscopy (select one):<br><input type="checkbox"/> FIT <input type="checkbox"/> Family History <input type="checkbox"/> Surveillance <input type="checkbox"/> Deviation | Reason Colonoscopy did not occur (select one):<br><input type="checkbox"/> No Show for Colonoscopy <input type="checkbox"/> Medically unfit day of procedure |
|---------------------------------------------------------------------------------------------------------------------------------------------------------------------------------------|--------------------------------------------------------------------------------------------------------------------------------------------------------------|

**1. BOWEL PREPARATION**

- Excellent    Good  
 Fair (adequate to visualize all polyps > 5mm)  
 Poor (inadequate to visualize all polyps > 5mm)

**3. UNPLANNED EVENTS**

- None  
 Perforation    Admit to hospital  
 Bleeding    Reversal agents  
 Cardiovascular    Death  
 Respiratory    Other (specify): \_\_\_\_\_

**2. CECAL INTUBATION (or ileocolonic anastomosis reached)**

- Yes → Photo documentation?    No    Yes  
 No    Uncertain    Flexible Sigmoidoscopy

**4. SPECIMENS TAKEN:**  Yes  No → **WITHDRAWAL TIME:** \_\_\_\_\_ (Minutes)

**5. COMMENTS TO PATHOLOGIST:**

|                | Specimen Type | Location | Size(mm) |     |       |     | Morphology | Primary Removal Mode | Submucosal Injection (Y/N) | Piecemeal (Y/N) | Complete Removal (Y/N/U) | Complete Retrieval (Y/N/U) | Specimen Sent (Y/N/#) | Time         | Initials  |
|----------------|---------------|----------|----------|-----|-------|-----|------------|----------------------|----------------------------|-----------------|--------------------------|----------------------------|-----------------------|--------------|-----------|
|                |               |          | ≤5       | 6-9 | 10-19 | ≥20 |            |                      |                            |                 |                          |                            |                       |              |           |
| <b>Example</b> | <b>P</b>      | <b>T</b> |          | ✓   |       |     | <b>P</b>   | <b>HS</b>            | <b>Y</b>                   | <b>Y</b>        | <b>Y</b>                 | <b>Y</b>                   | <b>Y</b>              | <b>14:00</b> | <b>AB</b> |
| 1/A            |               |          |          |     |       |     |            |                      |                            |                 |                          |                            |                       |              |           |
| 2/B            |               |          |          |     |       |     |            |                      |                            |                 |                          |                            |                       |              |           |
| 3/C            |               |          |          |     |       |     |            |                      |                            |                 |                          |                            |                       |              |           |
| 4/D            |               |          |          |     |       |     |            |                      |                            |                 |                          |                            |                       |              |           |
| 5/E            |               |          |          |     |       |     |            |                      |                            |                 |                          |                            |                       |              |           |

6.  Additional specimens recorded on Page 2

7.  Repeat Colonoscopy Required

**COMPLETE COLONOSCOPY REPORTING FORM FOR NEXT SCOPE**

|                                                         |                                                                                                                                                                      |                                                                                           |                                                                                                            |
|---------------------------------------------------------|----------------------------------------------------------------------------------------------------------------------------------------------------------------------|-------------------------------------------------------------------------------------------|------------------------------------------------------------------------------------------------------------|
| <b>Specimen Type</b><br>B = biopsies<br>P = polypectomy | <b>Location</b><br>A = ascending colon<br>C = cecum D = descending<br>I = ileum L = left colon<br>O = other/random<br>R = rectum S = sigmoid<br>T = transverse colon | <b>Morphology</b><br>F = flat<br>M = mass<br>O = other<br>P = pedunculated<br>S = sessile | <b>Removal Mode</b><br>BF = biopsy forceps<br>CS = cold snare<br>HB = hot biopsy forceps<br>HS = hot snare |
| Y = yes   N = no<br>U = uncertain                       |                                                                                                                                                                      |                                                                                           |                                                                                                            |

|                                 |                                 |
|---------------------------------|---------------------------------|
| MD NAME: _____ SIGNATURE: _____ | RN NAME: _____ SIGNATURE: _____ |
|---------------------------------|---------------------------------|

**SEND COPIES OF PATHOLOGY REPORT TO:**

|                                                        |                                            |                                 |                                 |
|--------------------------------------------------------|--------------------------------------------|---------------------------------|---------------------------------|
| 1. BC Cancer Colon Screening<br>Fax#: 1 (604) 297 9340 | 2. _____<br>Primary Provider (Name & MSC#) | 3. _____<br>Other (Name & MSC#) | 4. _____<br>Other (Name & MSC#) |
|--------------------------------------------------------|--------------------------------------------|---------------------------------|---------------------------------|

|                                                                                                       |                                                  |                |             |  |
|-------------------------------------------------------------------------------------------------------|--------------------------------------------------|----------------|-------------|--|
| Specimen tracking required by facility?<br><input type="checkbox"/> No <input type="checkbox"/> Yes → | Number of samples sent to collection area: _____ | INITIALS _____ | DATE: _____ |  |
|                                                                                                       | Number of samples transported to lab: _____      | INITIALS _____ | DATE: _____ |  |
|                                                                                                       | Number of samples received by lab: _____         | INITIALS _____ | DATE: _____ |  |

HEALTH AUTHORITY COPY

INFORMATION ON THIS FORM IS CONFIDENTIAL. IF YOU RECEIVE THIS IN ERROR PLEASE FAX TO QUALITY DEPT: 1 (604) 675 7223

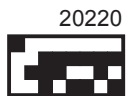

# COLONOSCOPY REPORTING FORM

DO NOT PLACE LABEL ABOVE LINE

AFFIX CLIENT LABEL HERE

PRESS FIRMLY TO ENSURE LEGIBILITY FOR MULTIPLE COPIES  
FAX TOP COPY TO COLON SCREENING PROGRAM: 1 (604) 297 9340  
GREY SECTIONS TO BE COMPLETED AS REQUIRED

|                      |                         |                              |                          |
|----------------------|-------------------------|------------------------------|--------------------------|
| EXAM DATE (YYYYMMDD) | START TIME (HRS)        | PHN                          | DATE OF BIRTH (YYYYMMDD) |
| FACILITY NAME        | AMENDED DATE (YYYYMMDD) | PATIENT NAME LAST            | PATIENT NAME FIRST       |
| SEX (M/F/X)          | COLONOSCOPIST (MSC)     | COLONOSCOPIST LAST, FIRST    | PRIMARY PROVIDER (MSC)   |
|                      |                         | PRIMARY PROVIDER LAST, FIRST |                          |

|                                                                                                                                                                                       |                                                                                                                                                              |
|---------------------------------------------------------------------------------------------------------------------------------------------------------------------------------------|--------------------------------------------------------------------------------------------------------------------------------------------------------------|
| Reason for Colonoscopy (select one):<br><input type="checkbox"/> FIT <input type="checkbox"/> Family History <input type="checkbox"/> Surveillance <input type="checkbox"/> Deviation | Reason Colonoscopy did not occur (select one):<br><input type="checkbox"/> No Show for Colonoscopy <input type="checkbox"/> Medically unfit day of procedure |
|---------------------------------------------------------------------------------------------------------------------------------------------------------------------------------------|--------------------------------------------------------------------------------------------------------------------------------------------------------------|

**1. BOWEL PREPARATION**

- Excellent    Good  
 Fair (adequate to visualize all polyps > 5mm)  
 Poor (inadequate to visualize all polyps > 5mm)

**3. UNPLANNED EVENTS**

- None  
 Perforation    Admit to hospital  
 Bleeding    Reversal agents  
 Cardiovascular    Death  
 Respiratory    Other (specify): \_\_\_\_\_

**2. CECAL INTUBATION (or ileocolonic anastomosis reached)**

- Yes → Photo documentation?    No    Yes  
 No    Uncertain    Flexible Sigmoidoscopy

**4. SPECIMENS TAKEN:**  Yes  No → **WITHDRAWAL TIME:** \_\_\_\_\_ (Minutes)

**5. COMMENTS TO PATHOLOGIST:**

|                | Specimen Type | Location | Size(mm) |     |       |     | Morphology | Primary Removal Mode | Submucosal Injection (Y/N) | Piecemeal (Y/N) | Complete Removal (Y/N/U) | Complete Retrieval (Y/N/U) | Specimen Sent (Y/N/#) | Time         | Initials  |
|----------------|---------------|----------|----------|-----|-------|-----|------------|----------------------|----------------------------|-----------------|--------------------------|----------------------------|-----------------------|--------------|-----------|
|                |               |          | ≤5       | 6-9 | 10-19 | ≥20 |            |                      |                            |                 |                          |                            |                       |              |           |
| <b>Example</b> | <b>P</b>      | <b>T</b> |          | ✓   |       |     | <b>P</b>   | <b>HS</b>            | <b>Y</b>                   | <b>Y</b>        | <b>Y</b>                 | <b>Y</b>                   | <b>Y</b>              | <b>14:00</b> | <b>AB</b> |
| 1/A            |               |          |          |     |       |     |            |                      |                            |                 |                          |                            |                       |              |           |
| 2/B            |               |          |          |     |       |     |            |                      |                            |                 |                          |                            |                       |              |           |
| 3/C            |               |          |          |     |       |     |            |                      |                            |                 |                          |                            |                       |              |           |
| 4/D            |               |          |          |     |       |     |            |                      |                            |                 |                          |                            |                       |              |           |
| 5/E            |               |          |          |     |       |     |            |                      |                            |                 |                          |                            |                       |              |           |

6.  Additional specimens recorded on Page 2

7.  Repeat Colonoscopy Required

COMPLETE COLONOSCOPY REPORTING FORM FOR NEXT SCOPE

| Specimen Type                     | Location                                                                                                                                          | Morphology                                                           | Removal Mode                                                                        |
|-----------------------------------|---------------------------------------------------------------------------------------------------------------------------------------------------|----------------------------------------------------------------------|-------------------------------------------------------------------------------------|
| B = biopsies<br>P = polypectomy   | A = ascending colon<br>C = cecum D = descending<br>I = ileum L = left colon<br>O = other/random<br>R = rectum S = sigmoid<br>T = transverse colon | F = flat<br>M = mass<br>O = other<br>P = pedunculated<br>S = sessile | BF = biopsy forceps<br>CS = cold snare<br>HB = hot biopsy forceps<br>HS = hot snare |
| Y = yes   N = no<br>U = uncertain |                                                                                                                                                   |                                                                      |                                                                                     |

|                                 |                                 |
|---------------------------------|---------------------------------|
| MD NAME: _____ SIGNATURE: _____ | RN NAME: _____ SIGNATURE: _____ |
|---------------------------------|---------------------------------|

**SEND COPIES OF PATHOLOGY REPORT TO:**

|                                                        |                                            |                                 |                                 |
|--------------------------------------------------------|--------------------------------------------|---------------------------------|---------------------------------|
| 1. BC Cancer Colon Screening<br>Fax#: 1 (604) 297 9340 | 2. _____<br>Primary Provider (Name & MSC#) | 3. _____<br>Other (Name & MSC#) | 4. _____<br>Other (Name & MSC#) |
|--------------------------------------------------------|--------------------------------------------|---------------------------------|---------------------------------|

|                                                                                                       |                                                  |                |             |
|-------------------------------------------------------------------------------------------------------|--------------------------------------------------|----------------|-------------|
| Specimen tracking required by facility?<br><input type="checkbox"/> No <input type="checkbox"/> Yes → | Number of samples sent to collection area: _____ | INITIALS _____ | DATE: _____ |
|                                                                                                       | Number of samples transported to lab: _____      | INITIALS _____ | DATE: _____ |
|                                                                                                       | Number of samples received by lab: _____         | INITIALS _____ | DATE: _____ |

COLONOSCOPIST COPY | FOR YOUR RECORDS

INFORMATION ON THIS FORM IS CONFIDENTIAL. IF YOU RECEIVE THIS IN ERROR PLEASE FAX TO QUALITY DEPT: 1 (604) 675 7223

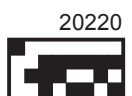

**PLEASE press firmly to ensure that all four copies of this form are legible. FAX the top copy.**

**Patient Identifiers:** A label can be used if legible and affixed in the upper right corner, otherwise complete all required fields.

**Partial Form Completion:** Medically Unfit / No Show requires partial form completion only (Patient Identifiers & Procedure Specifics)

- **No Show Patients:** Check box, Re-book patient. Complete Colonoscopy Reporting Form for next booking.
- **Medically Unfit Patients:** Select if the patient is medically unfit when they present to colonoscopy. Patient will be discharged from the Colon Screening Program.

- 1. Bowel Preparation:** If the preparation is poor, choose #7 "Repeat Procedure" and rebook (< 6months is recommended)
- 2. Cecal Intubation:** Photo documentation is the recommended method to record cecal intubation. Flexible sigmoidoscopy can be selected for patients undergoing flexible sigmoidoscopy for follow-up on partial removal of a high risk polyp in the distal colon.
- 3. Unplanned Event:** Recorded for quality assurance purposes.
- 4. Specimens Taken:** Select one of the "Yes" or "No" check boxes.

**NOTE:** Withdrawal time is in minutes for each colonoscopy in which NO intervention is performed.

**5. Comments to Pathologist:** Document additional information for the Pathologist.

**Specimen Table:** (as described by column moving from left to right of the table)

- **Specimen Container:** Uniquely identified as either "1" or "A", etc. and adapts to lab specimen container sequencing based on lab or HA requirements.
- **Specimen Type:** Requires a single letter from the legend and is either a (B) biopsy or a (P) polypectomy.

**NOTE:** Random biopsies can be placed together in the same specimen container however each polyp must be placed in an individual specimen container. Choose (P) for all polyps even if removed using biopsy forceps.

- **Location:** Requires a 1 letter code entry referenced under "Location" in the legend. Choose "Other" for random biopsies.
- **Size:** Requires one check mark only in one of the four columns based on size.
- **Morphology:** Requires a 1 letter code entry referenced under "Morphology" in the legend. Choose "Other" for random biopsies.
- **Primary Removal Mode:** Requires a 2 letter code entry referenced under "Removal Mode" in the legend.
- **Submucosal Injection:** Requires a "Y" for Yes, or "N" for No entry as per the legend.
- **Piecemeal:** Requires a "Y" for Yes, or "N" for No entry as per the legend.
- **Complete Removal:** Requires a "Y" for Yes, "N" for No or "U" for Uncertain entry as per the legend.
- **Complete Retrieval:** Requires a "Y" for Yes, "N" for No or "U" for Uncertain entry as per the legend.
- **Specimen Sent:** Requires a "Y" for Yes, "N" for No as per the legend (*# is the number of pieces and is optional based on lab or HA requirements*).
- **Time:** *Optional based on individual lab or HA requirements.*
- **Initials:** *Optional based on individual lab or HA requirements.*

**6. Additional specimens recorded on Page 2:** Check this box if there are more than 5 specimens, then use the Page 2 Form.

**7. Repeat Colonoscopy Required:** Check this box if an additional colonoscopy is required due to, for example, poor bowel prep, cecum not intubated, incomplete removal of polyps. The Colonoscopist should re-book the colonoscopy and complete the Colonoscopy Reporting Form for this subsequent colonoscopy to ensure the patient remains in the Program.

**Signature:** MD Name requires the Colonoscopist to print and sign their name indicating form accuracy and completion.

**Send Copies of Pathology Report To:**

1. This copy is for BC Cancer Colon Screening and is required to ensure complete screening records are maintained.
2. List the PCP Name and MSC# to ensure that a copy of the pathology report is sent to the primary care provider
3. & 4. Document the name and MSP/billing number of any other providers that should receive a copy of the pathology report

***Chain of Custody Section:*** *If applicable and required by HA, document the number of samples (specimen containers) sent, transported, and received by the lab, including the initials of the person and the date for each one of these three aspects.*

----- Please complete all required information on this form to prevent it from being returned and delaying patient care -----
