# Supplementary material for: Risks associated with colonoscopy in a population-based colon screening program: an observational cohort study
Source: PubMed Central journal article supplement — CMAJ Open. 2021 Oct 12;9(4):E940–7. doi: 10.9778/cmajo.20200192 (PMC8513602; doi:10.9778/cmajo.20200192), 2021-10-12
Supplement: 2020-0192-original-submission.pdf [file 2020-0192-original-submission.pdf]

## Colonoscopy related adverse events in a colon screening program – a population-based study

Marcel Tomaszewski MD<sup>1</sup>, David Sanders MD<sup>1</sup>, Robert Enns MD<sup>1</sup>, Laura Gentile MHA<sup>2</sup>, Scott Cowie MD<sup>1</sup>, Carla Nash MD<sup>1</sup>, Denis Petrunia MD<sup>1</sup>, Paul Mullins MD<sup>1</sup>, Nazanin Azari-Razm BBA<sup>2</sup>, Dmitriy Bykov MBA<sup>2</sup>, Jennifer Telford MD MPH<sup>1,2</sup>

1. Department of Medicine, Division of Gastroenterology, University of British Columbia, Vancouver, BC, Canada

2. British Columbia Cancer Screening Programs, Vancouver, BC, Canada

Corresponding author:

Marcel Tomaszewski, MD  
Gastroenterology Fellow  
Division of Gastroenterology  
University of British Columbia  
5153 - 2775 Laurel Street  
Vancouver, BC, V5Z 1M9  
Email: marcel.a.tomaszewski@gmail.com

No funding was received in order to pursue this study.

MT, DS, RE, LG, SC, CN, DP, PM, NA, DB and JT have no conflicts of interest to declare.

## **Abstract**

### **Background**

Colorectal cancer screening is recommended for Canadians between 50 and 74 years of age. The British Columbia Colon Screening Program (BCCSP) is a population-based program, screening average risk individuals with a biennial fecal immunochemical test (FIT) and colonoscopy to follow-up an abnormal FIT or for screening higher risk individuals. The risks of colonoscopy in a FIT-based screening program are not well understood. The objective was to determine the rate of colonoscopy related serious adverse events (SAEs) within the BCCSP.

### **Methods**

This is a population-based study with prospective data collection of all participants undergoing colonoscopy in BCCSP from November 1, 2013 to December 31, 2017. BCCSP contacts screening participants 14 days following colonoscopy to determine if any unplanned medical events occurred. Unplanned events underwent review and were defined as a SAE if they resulted in death, hospital admission or intervention, and sub-classified as probably, possibly, or unlikely related to the colonoscopy.

### **Results**

A total of 106,282 colonoscopies were performed by 308 physicians at 50 sites. SAEs were observed in 409 colonoscopies (47/10,000), of which 389 (95.1%) were probably or possibly related to colonoscopy. The perforation rate was 6 per 10,000, bleeding rate 27 per 10,000 and the mortality rate 3 per 100,000 colonoscopies.

1  
2  
3 Interpretation  
4

5 The BCCSP has a colonoscopy SAE rate in keeping with previous publications and meeting  
6 accepted benchmarks. The findings are generalizable to other jurisdictions and will help inform  
7  
8  
9  
10 FIT-based screening program stakeholders of the risks of colonoscopy.  
11  
12  
13  
14  
15  
16  
17  
18  
19  
20  
21  
22  
23  
24  
25  
26  
27  
28  
29  
30  
31  
32  
33  
34  
35  
36  
37  
38  
39  
40  
41  
42  
43  
44  
45  
46  
47  
48  
49  
50  
51  
52  
53  
54  
55  
56  
57  
58  
59  
60

Confidential

## Introduction

In Canada, colorectal cancer (CRC) is the second most common cause of cancer related death in men and third in women (1). While the incidence of CRC has declined slightly over time, it remains the second most commonly diagnosed cancer in Canada and 1 in 16 individuals will be diagnosed with CRC during their lifetime (1). Screening has been shown to decrease CRC related mortality and incidence (2) and to be cost effective when compared to not screening (3). Hence, the Canadian Task Force on Preventative Health has recommended colon screening for individuals 50 to 74 years of age with either a fecal occult blood test (FOBT) every two years or flexible sigmoidoscopy every 10 years (2). All Canadian provinces and one territory have commenced or intend to commence provincial colon screening programs using FOBT (4). Apart from one province, all are using a fecal immunochemical test (FIT) as the primary screening test. The FIT is a type of FOBT that detects human hemoglobin in stool using an immunoassay. It has been shown superior to traditional guaiac FOBT in terms of screening participation rates and detection of CRC and high-risk pre-cancerous polyps at follow-up colonoscopy (5). By 2025, there will be an estimated 12 million Canadians in the eligible age range for screening. Depending on participation with screening, colonoscopy to follow-up an abnormal FIT or a history of pre-cancerous polyps will become the most common indication for colonoscopy.

There are risks associated with undergoing colonoscopy, primarily bleeding following removal of a pre-cancerous polyp and perforation, but there is also a risk of dying following colonoscopy. Population-based screening targets asymptomatic healthy individuals and, therefore, any benefits derived through future prevention of CRC and CRC related mortality must account for the immediate harms of a colonoscopy related adverse event.

1  
2  
3 The risks of colonoscopy in Canada were described in a landmark population-based study  
4  
5 by Rabeneck et al (6) who assessed all outpatient colonoscopies in 50 to 75 year old individuals  
6  
7 living in four Canadian provinces and reported a risk of colonoscopy-related perforation of 9 per  
8  
9 10,000 colonoscopies, bleeding of 16 per 10,000 colonoscopies and death of 7 per 100,000  
10  
11 colonoscopies. A recent systematic review and meta-analysis, including three Canadian studies  
12  
13 (6-8), reported the risk of perforation and bleeding to be approximately 6 per 10,000  
14  
15 colonoscopies and 24 per 10,000 colonoscopies, respectively and the risk of colonoscopy-related  
16  
17 mortality to be 3 per 100,000 colonoscopies (9). The risk of bleeding (6, 9) and perforation (6) is  
18  
19 higher in patients undergoing polyp removal. Monitoring and reviewing post-colonoscopy  
20  
21 adverse events has become standard of care to identify performance gaps and continuously  
22  
23 improve the safety of colonoscopy (10-12).  
24  
25  
26  
27  
28  
29

30 FIT-based screening programs consist of an enriched patient population with a high  
31  
32 prevalence of pre-cancerous polyps. The risks of colonoscopy in this population are not well  
33  
34 understood and may differ from the published risks that have been the basis for the widely  
35  
36 accepted expert consensus benchmarks: less than 1 perforation per 500 colonoscopies  
37  
38 performed for any indication, less than 1 perforation per 1000 screening colonoscopies, and less  
39  
40 than 1 episode of bleeding per 100 colonoscopies (11).  
41  
42  
43  
44

45 The British Columbia Colon Screening Program (BCCSP) is a population-based program  
46  
47 enrolling 50 to 74-year-old average-risk adults for biennial FIT with follow-up colonoscopy for an  
48  
49 abnormal FIT and primary colonoscopy for individuals at higher than average risk of CRC. The  
50  
51 BCCSP colonoscopy serious adverse event rate is an important quality metric of the program and,  
52  
53 once established, will allow a more accurate informed consent discussion with screening  
54  
55  
56  
57  
58  
59  
60

1  
2  
3 participants undergoing colonoscopy. The objective of this study is to determine the overall  
4  
5 serious adverse event rate related to colonoscopy as well as the specific rates of death,  
6  
7 perforation and bleeding following colonoscopy.  
8  
9

## 10 11 12 **Methods**

### 13 14 *Study Design*

15  
16  
17 This is a population-based study with prospective data collection of all participants  
18  
19 referred for colonoscopy in the BCCSP from November 1, 2013 to December 31, 2017. A pRoject  
20  
21 Ethics Community Consensus Initiative (ARECCI) screening tool determined the project fell within  
22  
23 the category of Quality Improvement and Evaluation projects. As a result, the BC Cancer Research  
24  
25 Ethics Board waived review (reference H19-02975).  
26  
27  
28  
29  
30  
31

### 32 33 *BC Colon Screening Program*

34  
35 The BCCSP is a provincial CRC screening program available province-wide until 2015 at  
36  
37 which time the Northern Health Authority, in which resides 5.5% of the age eligible population,  
38  
39 ceased participating. Potential participants are initially risk-stratified by their primary care  
40  
41 provider. High risk participants, defined as having either a first-degree relative diagnosed with  
42  
43 CRC under the age of 60 years, 2 or more first-degree relatives diagnosed with CRC at any age, or  
44  
45 a personal history of pre-cancerous polyps, undergo primary colonoscopy within the program.  
46  
47 Participants aged 50-74 years are otherwise classified as average-risk and undergo biennial FIT  
48  
49 with a test cut-off of  $\geq 10$  microgram hemoglobin/gram feces (NS-Plus® Alfresa Pharma  
50  
51 Corporation, Japan). If FIT is abnormal or patient is at higher than average risk of CRC, the  
52  
53  
54  
55  
56  
57  
58  
59  
60

1  
2  
3 participant is referred by the BCCSP to local Health Authority staff who complete the pre-  
4  
5  
6 colonoscopy assessment with the patient and determine whether they are eligible for  
7  
8 colonoscopy. Exclusion criteria are participant refusal, a personal history of CRC, a personal  
9  
10 history of ulcerative colitis or Crohn's disease and significant medical co-morbidities  
11  
12 contraindicating colonoscopy. Colonoscopy is performed by a local physician in the participant's  
13  
14 community. Physicians performing BCCSP colonoscopies are general surgeons,  
15  
16 gastroenterologists, and internists and general or family practitioners with additional training in  
17  
18 colonoscopy. Trainees do not perform program colonoscopies.  
19  
20  
21

22  
23 Unplanned events are defined as those leading a participant to seek or receive additional  
24  
25 medical care. Unplanned events occurring during the colonoscopy are recorded by the  
26  
27 colonoscopist on a standardized Colonoscopy Report Form that is shared with BCCSP. BCCSP  
28  
29 contacts screening participants 14 days following the colonoscopy to determine whether an  
30  
31 unplanned event occurred the day prior (during bowel preparation) or in the 14 days following  
32  
33 the colonoscopy.  
34  
35  
36  
37  
38  
39

#### 40 *Unplanned Event Review*

41  
42 Unplanned events met criteria for review if the event was a perforation,  
43  
44 cardiovascular/respiratory event, or resulted in death, hospital admission, or significant  
45  
46 intervention including repeat colonoscopy, interventional radiology, surgery, blood transfusion,  
47  
48 or cardioversion. A review was conducted by the Colonoscopy Leads for each Health Authority  
49  
50 (SC, RE, PM, CN, DP) and the Medical Director (JT) and the Operations Director (LG) for the Colon  
51  
52 Screening Program. Unplanned events were defined as serious adverse events (SAE) if they  
53  
54  
55  
56  
57  
58  
59  
60

1  
2  
3 resulted in death, hospitalization or significant intervention and sub-classified as probably,  
4  
5 possibly, or unlikely related to the colonoscopy.  
6  
7

8 The primary outcome was the overall rate of SAEs. Secondary outcomes included 14-day  
9  
10 post-colonoscopy rates of perforation, bleeding and death per colonoscopy performed.  
11  
12

## 13 14 15 **Results**

### 16 17 *British Columbia Colon Screening Program: Participant and Colonoscopist Description*

18  
19  
20 106,282 colonoscopies were performed at 50 sites by 308 physicians. Of these, 63% were  
21  
22 surgeons, 20% gastroenterologists, 14% internists, and 3% general or family practitioners. The  
23  
24 median age of the participants was 67.0 years (57, 76 years; 10th, 90th percentile) and 56% were  
25  
26 male. Of the 106,282 colonoscopies included, 71,655 (66%) had a polyp removed.  
27  
28  
29  
30  
31

### 32 33 *British Columbia Colon Screening Program: Serious Adverse Events*

34  
35 87,007 (82%) of the participants were successfully contacted following colonoscopy  
36  
37 (Figure 1). SAEs were observed in 409 (0.47%) colonoscopies, or 47 per 10,000 colonoscopies. Of  
38  
39 these, 389 (95%) were probably or possibly related to the colonoscopy (Table 1). Perforation  
40  
41 occurred in 56 colonoscopies (6/10,000 colonoscopies) and bleeding was recorded in 239  
42  
43 colonoscopies (27/10,000 colonoscopies). Less frequent SAEs included cardiovascular events (20  
44  
45 events), post-polypectomy syndrome (17 events), events related to bowel preparation (13  
46  
47 events), and splenic injury (four events) (Table 1).  
48  
49  
50  
51

52 Three deaths were noted within 14 days of colonoscopy (3/100,000 colonoscopies). Two  
53  
54 deaths occurred following perforation. One death occurred at home three days following  
55  
56  
57  
58  
59  
60



1  
2  
3 colonoscopy in a patient with significant co-morbid medical conditions was determined to be  
4  
5 possibly related to colonoscopy.  
6  
7  
8  
9

### 10 **Interpretation**

11  
12  
13 The rate of colonoscopy-related SAEs was determined in the BCCSP using prospective  
14 data collection and formal review of unplanned events. The risk of a SAE occurring 14 days  
15 following colonoscopy was 47 per 10,000 colonoscopies including a 6 per 10,000 risk of  
16 perforation, a 27 per 10,000 risk of bleeding and a 3 per 100,000 risk of death. The BCCSP has a  
17 colonoscopy-related rate of SAEs meeting accepted benchmarks (11), particularly in the context  
18 of the high proportion of colonoscopies with polyp removal, which is a known risk factor for  
19 perforation and bleeding (6, 13).  
20  
21  
22  
23  
24  
25  
26  
27  
28  
29

30 Kothari et al performed a recent systematic review and meta-analysis, including three  
31 Canadian studies, assessing colonoscopy SAE rates amongst 21 population-level studies (9). The  
32 pooled rate of perforation amongst 10,328,360 colonoscopies was 6 per 10,000 colonoscopies  
33 with significant heterogeneity between studies due to inclusion of all patient ages and indications  
34 for colonoscopy. After adjusting for age and gender between different studies, polypectomy was  
35 not significantly associated with a risk of perforation. In contrast, Rabeneck et al. retrospectively  
36 assessed 97,091 outpatient colonoscopies performed for various indications in 50 to 75-year old  
37 Canadians and reported a perforation rate of 9 per 10,000 colonoscopies with a 3-fold higher risk  
38 of perforation when a polyp was removed (6). Similarly, within the BCCSP, the majority (81%) of  
39 perforations were attributed to polypectomy. Colonoscopy-related bleeding occurred in 27 per  
40 10,000 colonoscopies, a rate in keeping with the systematic review which reported a 24 per  
41  
42  
43  
44  
45  
46  
47  
48  
49  
50  
51  
52  
53  
54  
55  
56  
57  
58  
59  
60

1  
2  
3 10,000 risk of bleeding based on over 5 million colonoscopies (9). Bleeding was strongly  
4  
5 associated with polypectomy (6, 9). The rate of mortality directly attributable to colonoscopy in  
6  
7 the current study was 3 per 100,000 colonoscopies. This is identical to the pooled rate by Kothari  
8  
9 et al, who also found that cardiopulmonary events or sequelae of bowel perforation were the  
10  
11 most commonly reported causes of death, consistent with our findings (9).  
12  
13  
14

15         There are few studies evaluating colonoscopy-related complications in FIT-based  
16  
17 screening programs and it is difficult to interpret the findings relative to other programs due to  
18  
19 different processes and timing of data collection (Table 2). The Danish and Basque screening  
20  
21 programs reported serious adverse event rates that were higher than the current study (14, 15)  
22  
23 perhaps, in part, due to a longer window of data collection following colonoscopy. In addition,  
24  
25 both these studies used administrative databases rather than contacting the participant directly.  
26  
27 In the Basque study, which did not perform chart review, it is possible that some hospital  
28  
29 admissions were misclassified as a colonoscopy related complication. Alternatively, participant  
30  
31 self-reported unplanned events may result in underestimating colonoscopy risk. However, the  
32  
33 process of participant contact to ascertain adverse events has been validated by the English  
34  
35 National Bowel Screening Program (16). Finally, the Slovenian FIT-based screening program  
36  
37 reported very low rates of adverse events (17). Data on adverse events was collected via a  
38  
39 standard form initiated by physicians or patients and it is unlikely that such methodology  
40  
41 captured all adverse events. There are higher quality publications on colonoscopy-related  
42  
43 complications in screening programs using guaiac based FOBTs (Table 2) but the rates of adverse  
44  
45 events continue to vary widely (18-20).  
46  
47  
48  
49  
50  
51  
52  
53  
54  
55  
56  
57  
58  
59  
60

1  
2  
3 The strengths of this study include the large number of colonoscopies included and  
4 population-based design. Systematic, prospective data gathering, event reporting and  
5 assessment enhance the quality of the results. Furthermore, the indication for all the  
6 colonoscopies was screening, the majority in follow-up of an abnormal FIT. Physicians performing  
7 colonoscopy in BCCSP have varied training backgrounds and practice settings. As a result, the  
8 data should be generalizable to other population-based screening programs with a similar  
9 mixture of physicians, as is the case in other Canadian provinces (8).

10  
11  
12  
13  
14  
15  
16  
17  
18  
19  
20 This study may be limited by the duration of follow up post-colonoscopy. Fourteen day  
21 unplanned hospitalization following colonoscopy is a quality indicator for Canadian colon  
22 screening programs as established by the Canadian Partnership Against Cancer (12). However, a  
23 recent study has included follow up for 30 days post-colonoscopy and demonstrated that SAEs  
24 may occur between 14 and 30 days (21). Second, it was not possible to contact all patients who  
25 underwent a BCCSP colonoscopy. These factors could have led to an underestimate of the SAE  
26 rate. In future studies, data linkage to hospital administrative databases could further validate  
27 our findings.

28  
29  
30  
31  
32  
33  
34  
35  
36  
37  
38  
39  
40 In conclusion, the BCCSP colonoscopy-related SAE rate is in keeping with previous  
41 publications and meets accepted benchmarks. This study will help BCCSP, and other provincial  
42 screening programs, inform screening participants about the risks of colonoscopy in a FIT-based  
43 colon screening program.

Tables and Figures

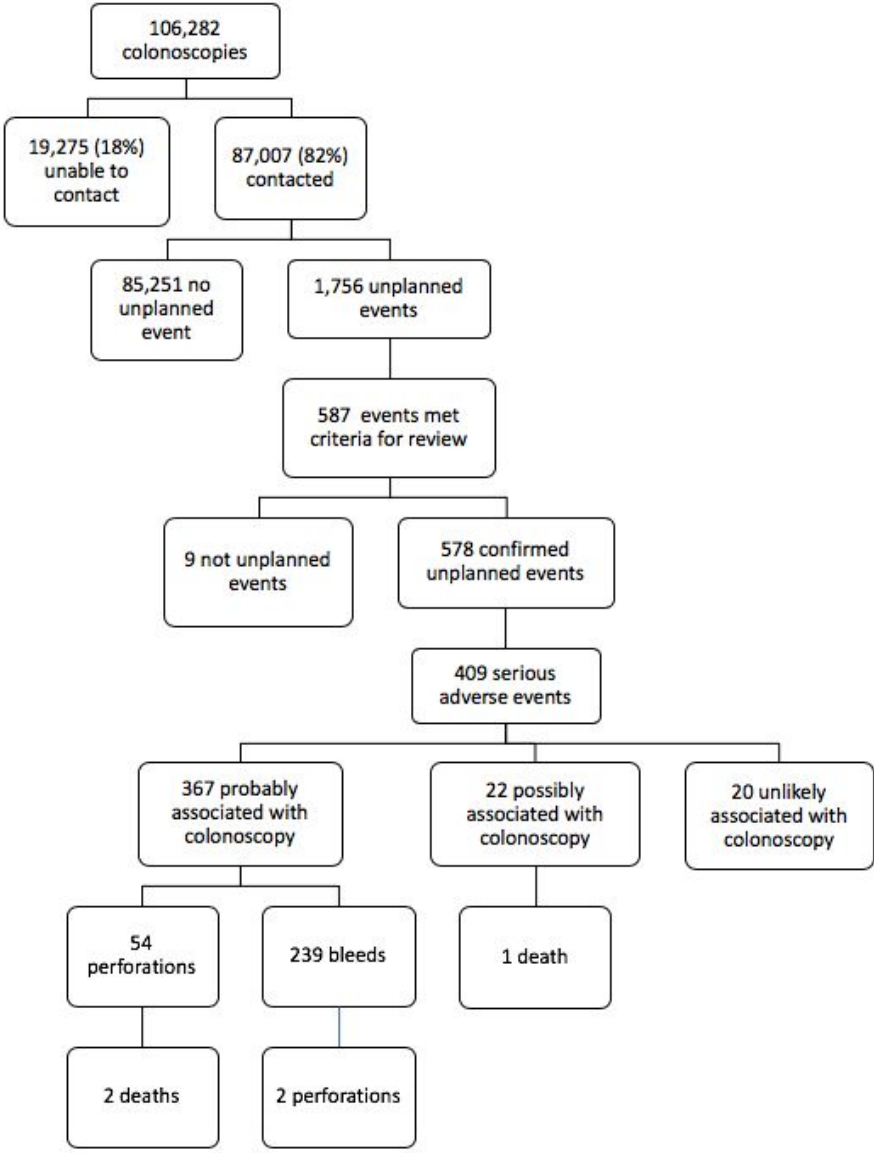

Figure 1. Serious adverse events of the British Columbia Colon Screening Program

| SAE                              | N   | Repeat<br>colonoscopy | Surgery   | Blood<br>Transfusion | Death   |
|----------------------------------|-----|-----------------------|-----------|----------------------|---------|
| Perforation*                     | 56  | 2* (3.6)              | 44 (78.6) | 1 (1.8)              | 2 (3.6) |
| Bleeding                         | 239 | 123 (51.5)            | 4 (1.7)   | 57 (23.8)            | 0       |
| Post-<br>polypectomy<br>syndrome | 17  | 0                     | 0         | 0                    | 0       |
| Bowel<br>preparation             | 13  | 2 (15.4)              | 1 (7.7)   | 0                    | 0       |
| Splenic injury                   | 4   | 0                     | 1 (25.0)  | 1 (25.0)             | 0       |
| Cardiovascular                   | 20  | 1 (5.0)               | 4 (20.0)  | 1 (5.0)              | 1 (5.0) |
| Respiratory                      | 3   | 1 (33.3)              | 0         | 0                    | 0       |
| Other                            | 37  | 0                     | 13 (35.1) | 3 (8.1)              | 0       |
| Total                            | 389 | 129 (33.2)            | 67 (17.2) | 63 (16.2)            | 3 (0.8) |

Table 1. Outcome of SAEs probably or possibly related to colonoscopy N (%)

Legend: \*2 patients with post-polypectomy bleeding who sustained a perforation as a complication of endoscopic therapy.

1  
2  
3  
4  
5  
6  
7  
8  
9  
10  
11  
12  
13  
14  
15  
16  
17  
18  
19  
20  
21  
22  
23  
24  
25  
26  
27  
28  
29  
30  
31  
32  
33  
34  
35  
36  
37  
38  
39  
40  
41  
42  
43  
44  
45  
46  
47

| Study                | Number of colonoscopies | Data Collection                                                                        | FOBT         | Polyp Removed (%) | Follow-up                                                   | Total      | Perforation | Bleeding   | Death     |
|----------------------|-------------------------|----------------------------------------------------------------------------------------|--------------|-------------------|-------------------------------------------------------------|------------|-------------|------------|-----------|
| British Columbia     | 106,282                 | Phone call                                                                             | FIT          | 66%               | 14 days                                                     | 47/10,000  | 6/10,000    | 27/10,000  | 3/100,000 |
| Basque, Spain (14)   | 39,254                  | Hospital admission data                                                                | FIT          | NR                | 30 days                                                     | 100/10,000 | 27/10,000   | 62/10,000  | NR        |
| Denmark (15)         | 14,671                  | Chart review of cases identified through hospital admission data                       | FIT          | 55%               | 14 days bleeding<br>30 days for other SAEs<br>90 days death | 61/10,000  | 10/10,000   | 41/10,000  | 7/100,000 |
| Slovenia (17)        | 13,919                  | Physician and/or patients had the option of mailing a standardized form to the program | FIT          | NR                | NR                                                          | 8/10,000   | 8/10,000    | 3/10,000   | NR        |
| England (19)         | 130,831                 | Phone call 1 day following and mailed questionnaire 30 days following                  | Guaiaac FOBT | 53%               | 30 days                                                     | 142/10,000 | 6/10,000    | 65/10,000  | 0         |
| Alsace, France (18)  | 10,277                  | Phone call 1 day following and mailed questionnaire 30 days following                  | Guaiaac FOBT | 49%               | 30 days                                                     | 243/10,000 | 10/10,000   | 30/10,000  | 0         |
| Gotland, Sweden (20) | 2,984                   | Hospital admission data                                                                | Guaiaac FOBT | 40%               | 30 days                                                     | 100/10,000 | 10/10,000   | 140/10,000 | 0         |

Table 2 Risks of colonoscopy in FOBT-based CRC screening programs  
 Legend: FOBT, fecal occult blood test; FIT, fecal immunochemical test; NR, not reported

## References

1. Canadian Cancer Statistics Advisory Committee. Canadian Cancer Statistics 2019. Toronto, ON: Canadian Cancer Society; 2019.
2. Recommendations on screening for colorectal cancer in primary care. *CMAJ : Canadian Medical Association journal = journal de l'Association medicale canadienne*. 2016;188(5):340-8.
3. Rabeneck L, Rumble RB, Thompson F, Mills M, Oleschuk C, Whibley A, et al. Fecal immunochemical tests compared with guaiac fecal occult blood tests for population-based colorectal cancer screening. *Canadian journal of gastroenterology = Journal canadien de gastroenterologie*. 2012;26(3):131-47.
4. Telford JJ, Levy AR, Sambrook JC, Zou D, Enns RA. The cost-effectiveness of screening for colorectal cancer. *CMAJ : Canadian Medical Association journal = journal de l'Association medicale canadienne*. 2010;182(12):1307-13.
5. Canadian Partnership Against Cancer. Colorectal Cancer Screening in Canada: Environmental Scan. Toronto: Canadian Partnership Against Cancer; 2018.
6. Rabeneck L, Paszat LF, Hilsden RJ, Saskin R, Leddin D, Grunfeld E, et al. Bleeding and perforation after outpatient colonoscopy and their risk factors in usual clinical practice. *Gastroenterology*. 2008;135(6):1899-906, 906.e1.
7. Bielawska B, Day AG, Lieberman DA, Hookey LC. Risk factors for early colonoscopic perforation include non-gastroenterologist endoscopists: a multivariable analysis. *Clinical gastroenterology and hepatology : the official clinical practice journal of the American Gastroenterological Association*. 2014;12(1):85-92.
8. Singh H, Penfold RB, DeCoster C, Kaita L, Proulx C, Taylor G, et al. Colonoscopy and its complications across a Canadian regional health authority. *Gastrointestinal endoscopy*. 2009;69(3 Pt 2):665-71.
9. Kothari ST, Huang RJ, Shaukat A, Agrawal D, Buxbaum JL, Abbas Fehmi SM, et al. ASGE review of adverse events in colonoscopy. *Gastrointestinal endoscopy*. 2019;90(6):863-76.
10. Armstrong D, Barkun A, Bridges R, Carter R, de Gara C, Dube C, et al. Canadian Association of Gastroenterology consensus guidelines on safety and quality indicators in endoscopy. *Canadian journal of gastroenterology = Journal canadien de gastroenterologie*. 2012;26(1):17-31.
11. Rex DK, Schoenfeld PS, Cohen J, Pike IM, Adler DG, Fennerty MB, et al. Quality indicators for colonoscopy. *Gastrointestinal endoscopy*. 2015;81(1):31-53.
12. Canadian Partnership Against Cancer. Quality Determinants and Indicators for Measuring Colorectal Cancer Screening Program Performance in Canada. Toronto: The Partnership, 2012.
13. Reumkens A, Rondagh EJ, Bakker CM, Winkens B, Masclee AA, Sanduleanu S. Post-Colonoscopy Complications: A Systematic Review, Time Trends, and Meta-Analysis of Population-Based Studies. *The American journal of gastroenterology*. 2016;111(8):1092-101.
14. Arana-Arri E, Imaz-Ayo N, Fernandez MJ, Idigoras I, Bilbao I, Bujanda L, et al. Screening colonoscopy and risk of adverse events among individuals undergoing fecal immunochemical testing in a population-based program: A nested case-control study. *United European gastroenterology journal*. 2018;6(5):755-64.

15. Mikkelsen EM, Thomsen MK, Tybjerg J, Friis-Hansen L, Andersen B, Jorgensen JCR, et al. Colonoscopy-related complications in a nationwide immunochemical fecal occult blood test-based colorectal cancer screening program. *Clinical epidemiology*. 2018;10:1649-55.
16. Lee TJ, Rutter MD, Blanks RG, Moss SM, Goddard AF, Chilton A, et al. Colonoscopy quality measures: experience from the NHS Bowel Cancer Screening Programme. *Gut*. 2012;61(7):1050-7.
17. Tepes B, Bracko M, Novak Mlakar D, Stefanovic M, Stabuc B, Frkovic Grazio S, et al. Results of the FIT-based National Colorectal Cancer Screening Program in Slovenia. *Journal of clinical gastroenterology*. 2017;51(6):e52-e9.
18. Denis B, Gendre I, Sauleau EA, Lacroute J, Perrin P. Harms of colonoscopy in a colorectal cancer screening programme with faecal occult blood test: a population-based cohort study. *Digestive and liver disease : official journal of the Italian Society of Gastroenterology and the Italian Association for the Study of the Liver*. 2013;45(6):474-80.
19. Rutter MD, Nickerson C, Rees CJ, Patnick J, Blanks RG. Risk factors for adverse events related to polypectomy in the English Bowel Cancer Screening Programme. *Endoscopy*. 2014;46(2):90-7.
20. Saraste D, Martling A, Nilsson PJ, Blom J, Törnberg S, Hultcrantz R, et al. Complications after colonoscopy and surgery in a population-based colorectal cancer screening programme. *Journal of medical screening*. 2016;23(3):135-40.
21. Wang L, Mannalithara A, Singh G, Ladabaum U. Low Rates of Gastrointestinal and Non-Gastrointestinal Complications for Screening or Surveillance Colonoscopies in a Population-Based Study. *Gastroenterology*. 2018;154(3):540-55.e8.
